# Supplementary material for: Conformational and entropy analyses of extended molecular dynamics simulations of α-, β- and γ-cyclodextrins and of the β-cyclodextrin/nabumetone complex
Source: Royal Society of Chemistry journal article supplement (doi:10.1039/c6cp06107a), 2016-12-06
Supplement: c6cp06107a1.pdf [file c6cp06107a1.pdf]

## **Conformational and Entropy Analyses of Extended Molecular Dynamics Simulations of $\alpha$ -, $\beta$ - and $\gamma$ -Cyclodextrin and of the $\beta$ -Cyclodextrin/Nabumetone Complex**

Dimas Suárez\* and Natalia Díaz

Dpto. de Química Física y Analítica, Universidad de Oviedo, Oviedo, 33006, Spain.

[\\*dimas@uniovi.es](mailto:*dimas@uniovi.es)

### **Supporting Information**

**Figure S1.** Histograms of the  $\phi$  and  $\psi$  dihedral angles computed for all the glucose units during the production phase of the MD simulations of native  $\alpha$ -,  $\beta$ -, and  $\gamma$ -CDs.

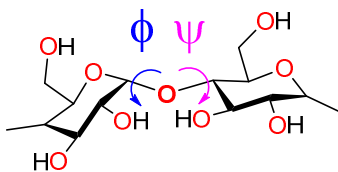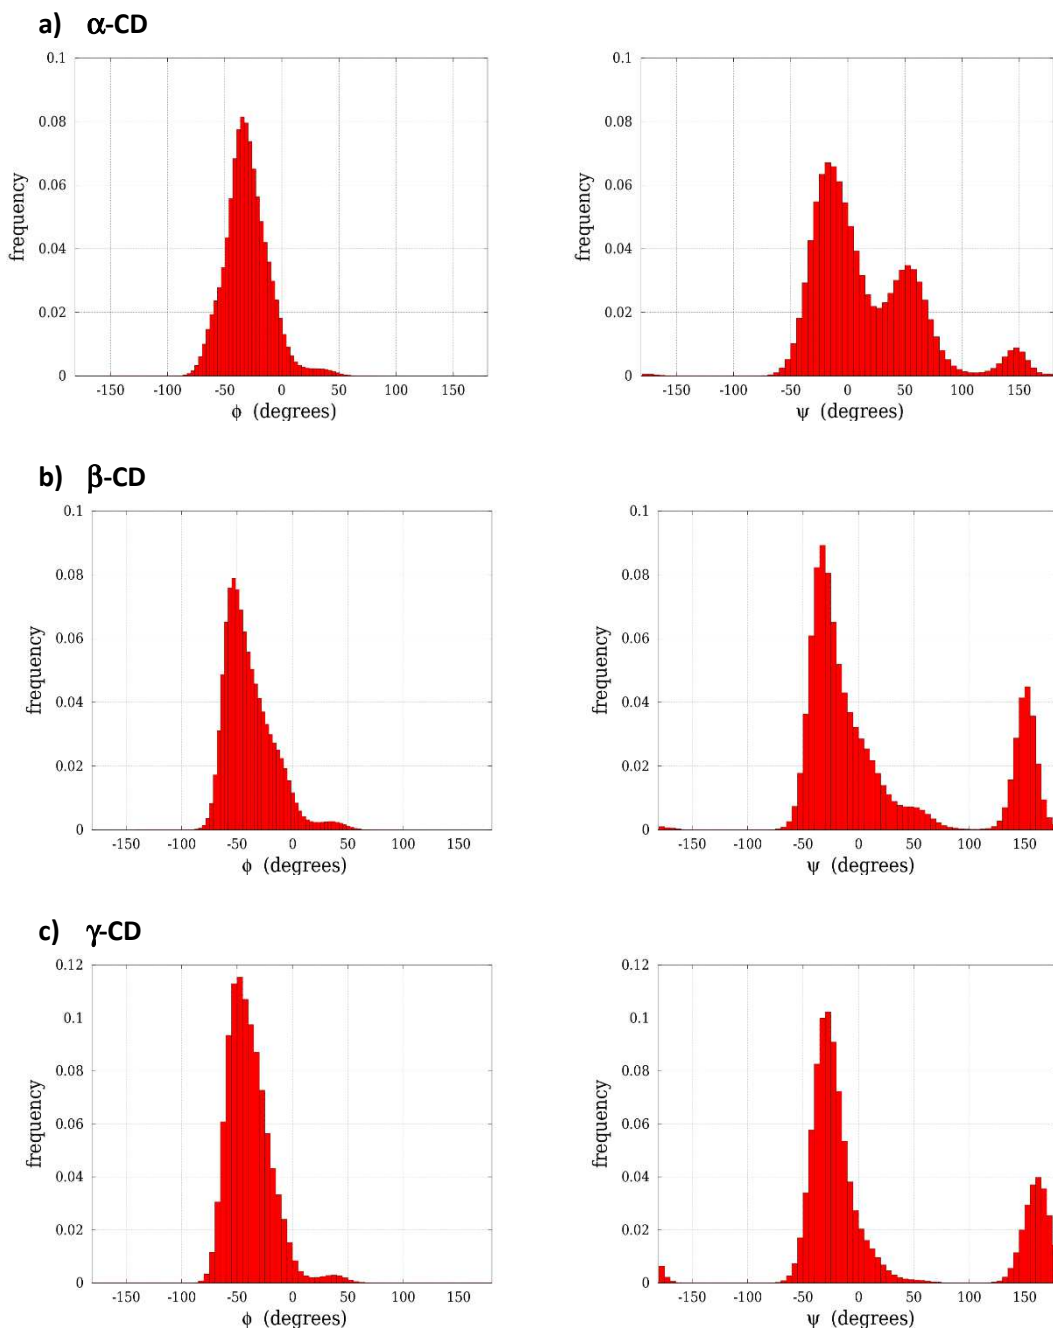

**Figure S2.** Time evolution of the radius of accessibility of the internal cavity of the CDs during the MD simulations.

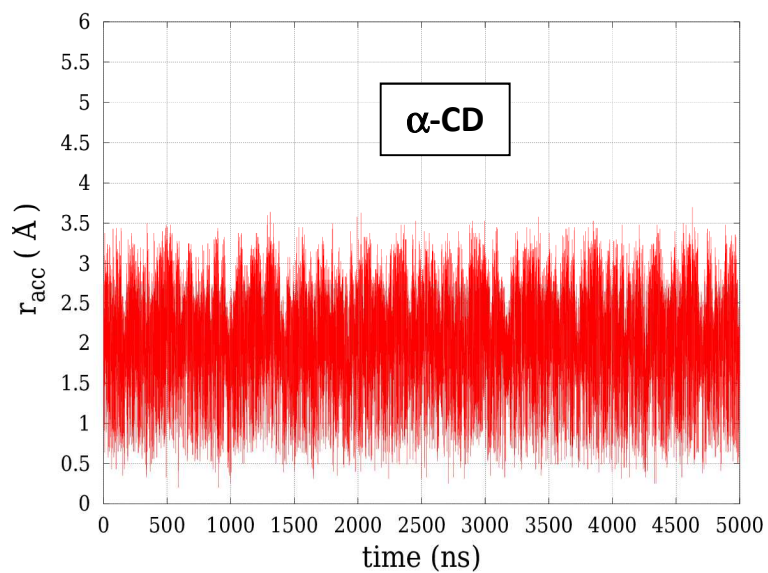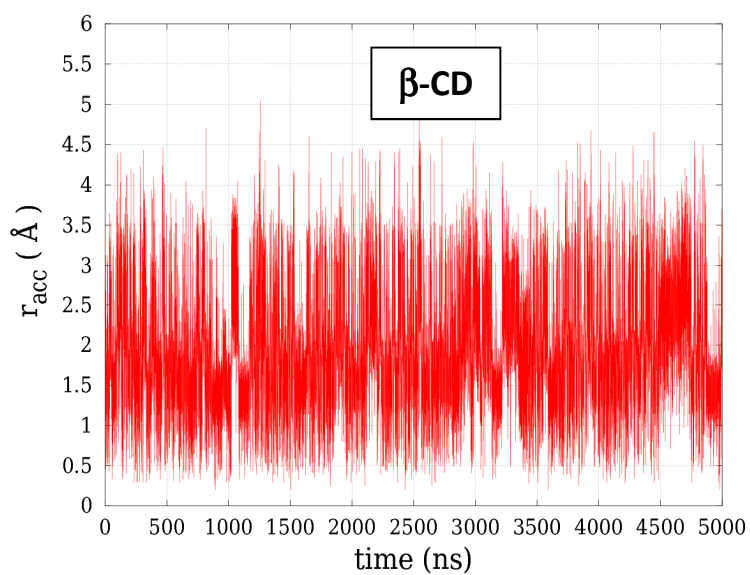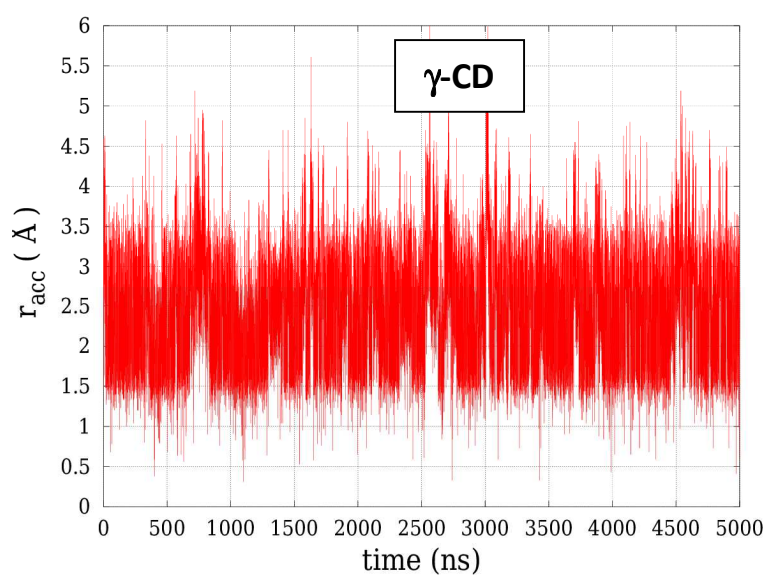

**Figure S3.** Correlation plots between  $r_{\text{acc}}$  values and the number of water molecules for CD structures showing inclusion complexes with water molecules.

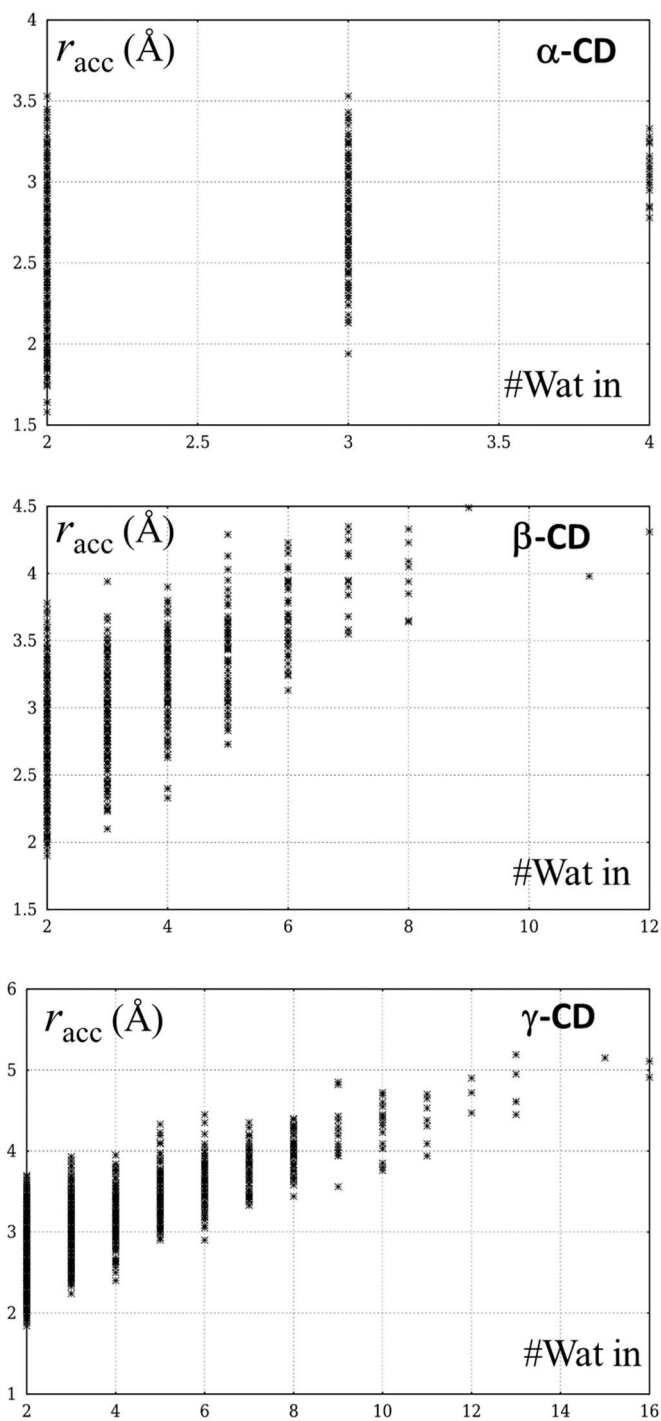

**Figure S4.** In the upper plot, probability density function for selected dihedral angles of  $\gamma$ -CD (a-d),  $\beta$ -CD (e) and  $\alpha$ -CD (f), as obtained from a histogram representation and a Von-Mises kernel estimator (red curve). The lower plot shows the time evolution of the associated discrete variables. Note that plots (d-f) correspond to conformational motions around the glycosidic C4-O4 bond although the definition of the corresponding dihedral angle does not match that of the  $\psi$  angle.

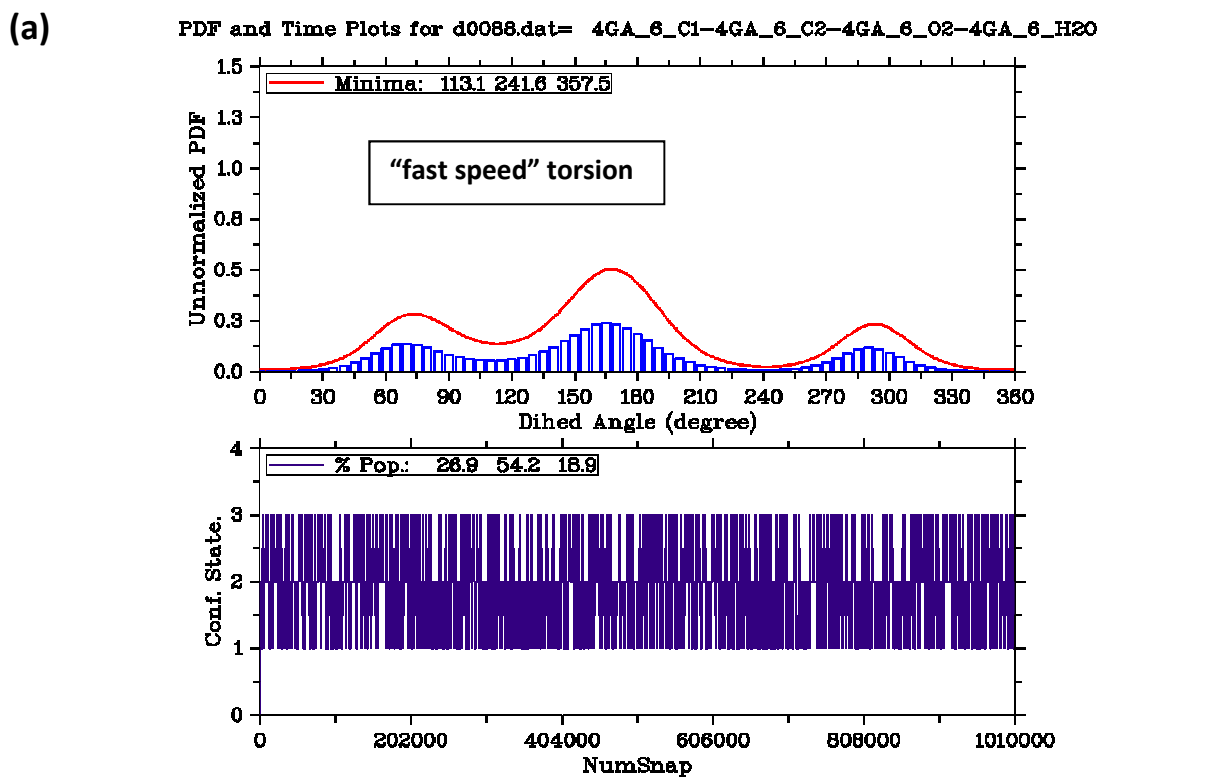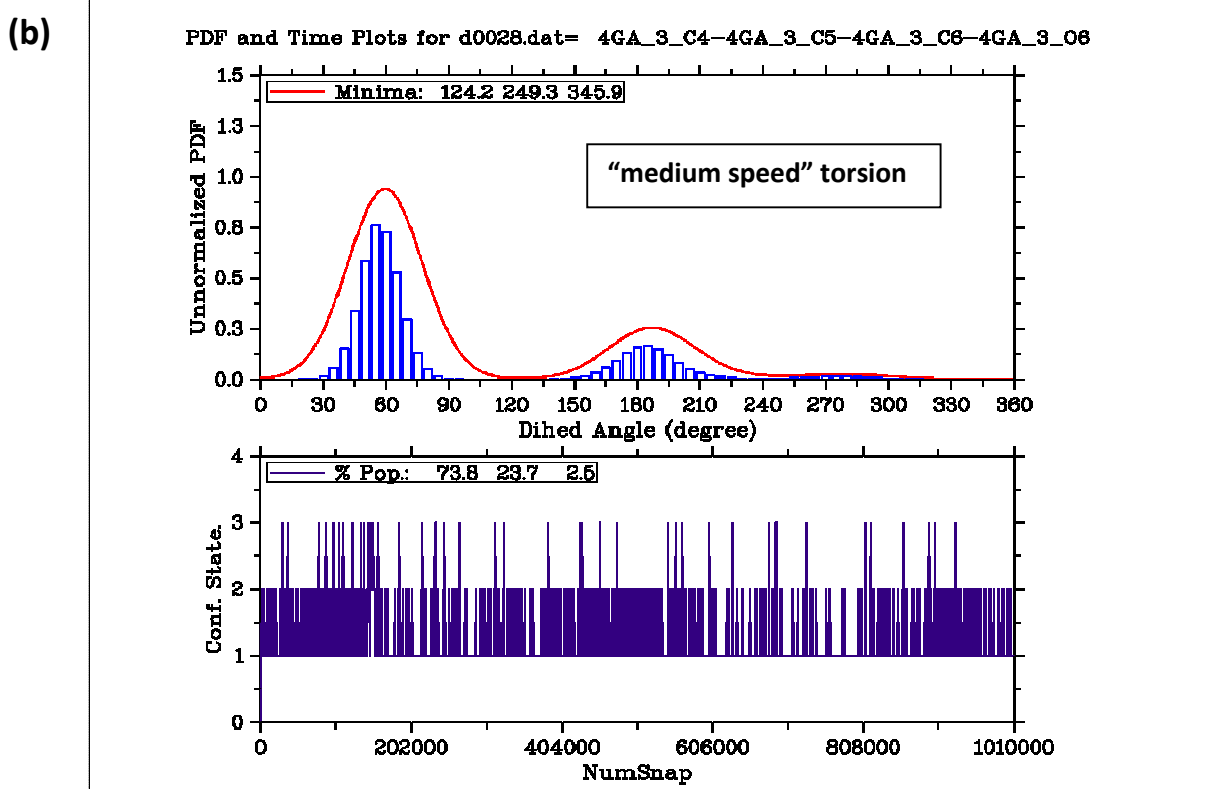

Figure S4 (cont).

(c)

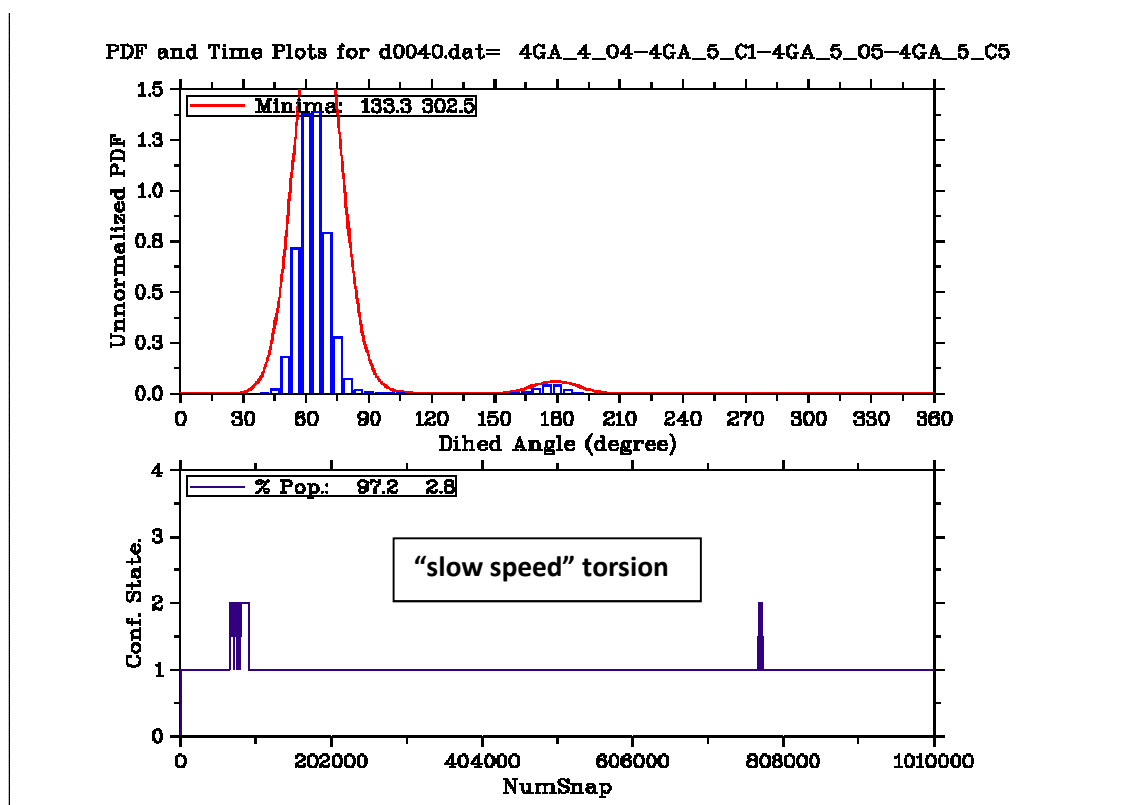

(d)

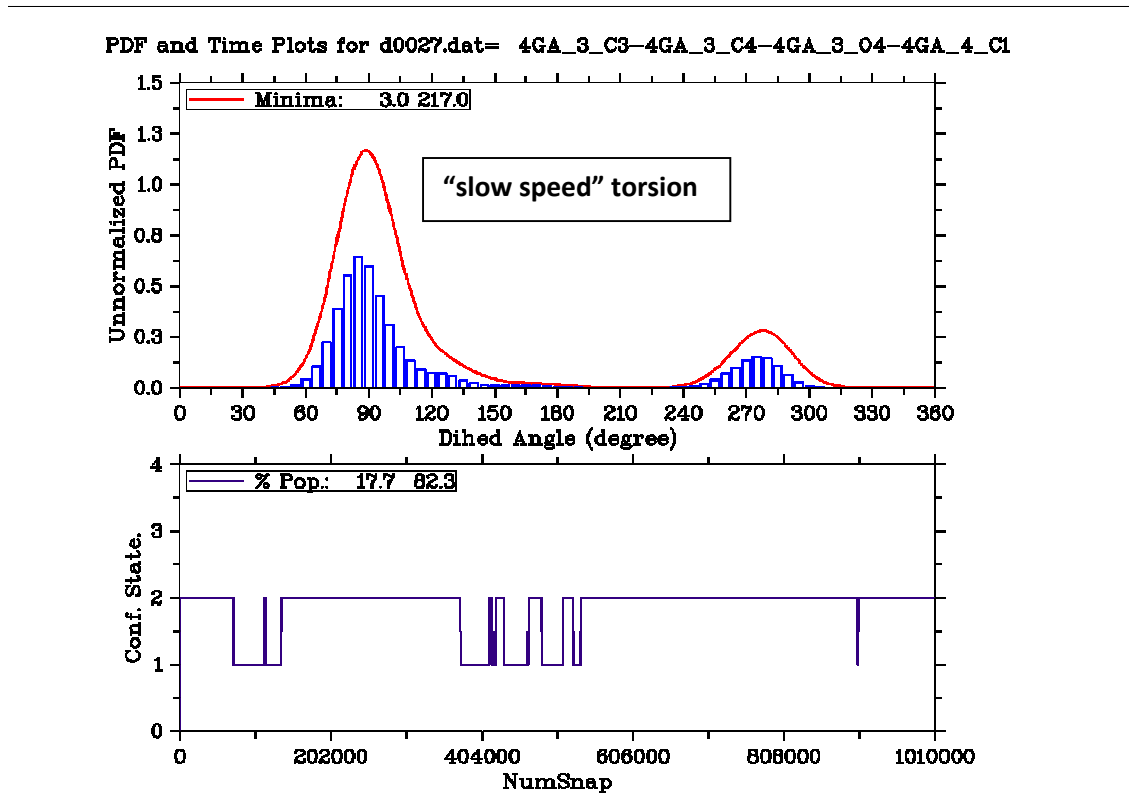

Figure S4 (cont).

(e)

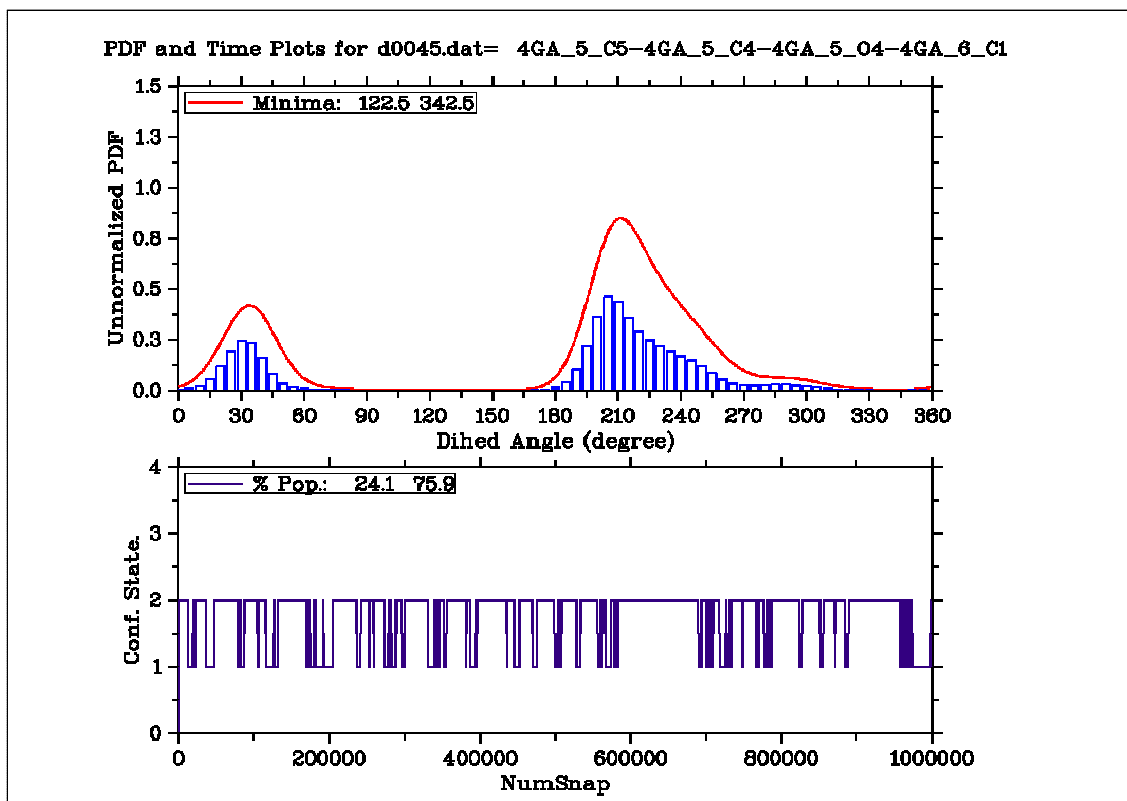

(f)

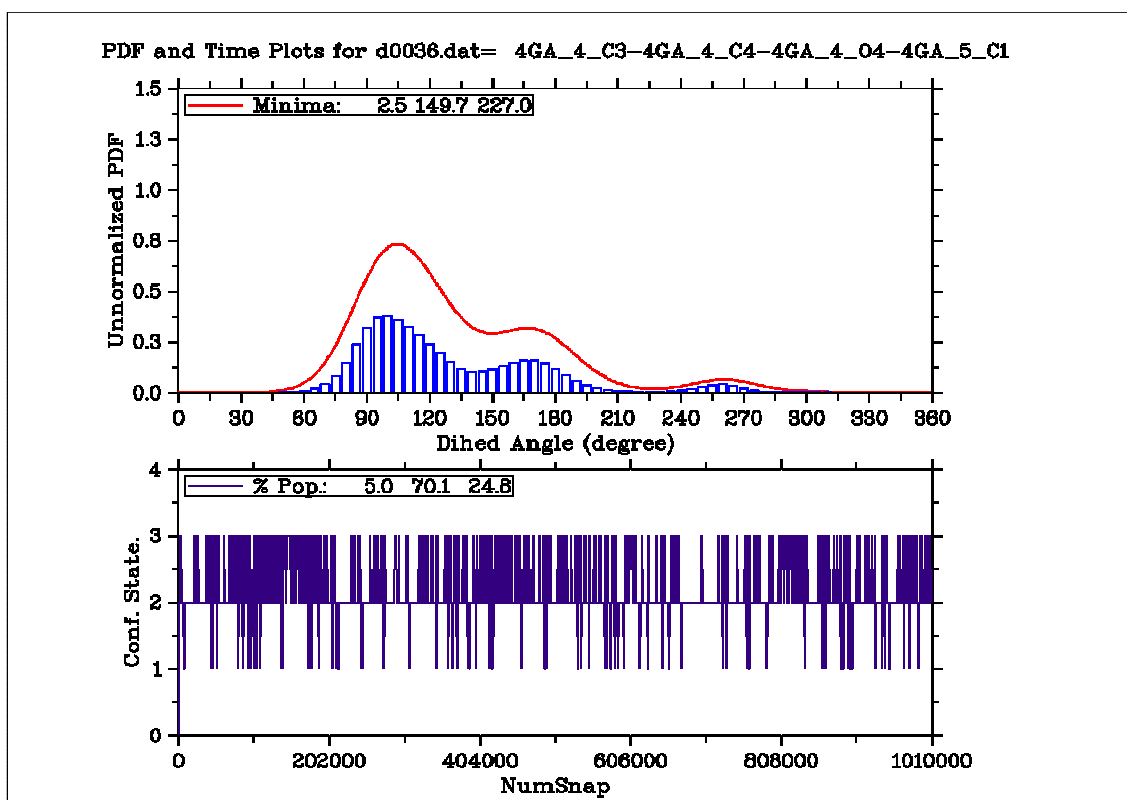

**mol2 file containing the initial geometry of the nabumetone ligand, GAFF atom types and HF/6-31G\* RESP charges.**

```

@<TRIPOS>MOLECULE
LIG
  33   34   1   0   0
SMALL
rc
@<TRIPOS>ATOM
  1 C1      5.9420  -0.0700   1.3530  c3      1 LIG      -0.247874
  2 C2      5.0270  -0.1780   0.1510  c      1 LIG       0.602829
  3 C3      3.5490   0.0590   0.4040  c3     1 LIG      -0.028607
  4 C4      2.6850  -0.0680  -0.8540  c3     1 LIG      -0.028958
  5 C5      1.2200   0.1810  -0.5700  ca     1 LIG      -0.002054
  6 C6      0.3320  -0.8420  -0.4430  ca     1 LIG      -0.192815
  7 C7     -1.0390  -0.6100  -0.1520  ca     1 LIG       0.089967
  8 C8     -1.9710  -1.6730  -0.0110  ca     1 LIG      -0.266465
  9 C9     -3.2760  -1.4250   0.2680  ca     1 LIG      -0.140046
 10 C10    -3.7290  -0.0910   0.4210  ca     1 LIG       0.243615
 11 O1     -5.0370   0.1330   0.7290  os     1 LIG      -0.356695
 12 C11    -5.9290   0.1040  -0.3570  c3     1 LIG       0.033626
 13 C12    -2.8640   0.9480   0.2960  ca     1 LIG      -0.248428
 14 C13    -1.4950   0.7110   0.0090  ca     1 LIG       0.098450
 15 C14    -0.5580   1.7700  -0.1310  ca     1 LIG      -0.225442
 16 C15     0.7450   1.5130  -0.4100  ca     1 LIG      -0.158629
 17 O2     5.4510  -0.4360  -0.9340  o      1 LIG      -0.539464
 18 H1     6.9630  -0.2610   1.0520  hc     1 LIG       0.064493
 19 H2     5.6490  -0.7850   2.1160  hc     1 LIG       0.064493
 20 H3     5.8720   0.9190   1.7940  hc     1 LIG       0.064493
 21 H4     3.4370   1.0440   0.8530  hc     1 LIG       0.010801
 22 H5     3.2160  -0.6440   1.1640  hc     1 LIG       0.010801
 23 H6     2.8180  -1.0560  -1.2760  hc     1 LIG       0.032317
 24 H7     3.0430   0.6320  -1.6020  hc     1 LIG       0.032317
 25 H8     0.6620  -1.8600  -0.5660  ha     1 LIG       0.144455
 26 H9    -1.6260  -2.6860  -0.1230  ha     1 LIG       0.166423
 27 H10   -3.9800  -2.2280   0.3930  ha     1 LIG       0.142664
 28 H11   -6.9150   0.2890   0.0440  h1     1 LIG       0.059444
 29 H12   -5.9190  -0.8620  -0.8510  h1     1 LIG       0.059444
 30 H13   -5.6820   0.8730  -1.0820  h1     1 LIG       0.059444
 31 H14   -3.2220   1.9530   0.4270  ha     1 LIG       0.153949
 32 H15   -0.8980   2.7850  -0.0180  ha     1 LIG       0.154145
 33 H16    1.4360   2.3300  -0.5220  ha     1 LIG       0.147309
@<TRIPOS>BOND
  1  1  2  1
  2  1 18  1
  3  1 19  1
  4  1 20  1
  5  2  3  1
  6  2 17  2
  7  3  4  1
  8  3 21  1
  9  3 22  1
 10  4  5  1
 11  4 23  1
 12  4 24  1
 13  5  6  ar
 14  5 16  ar
 15  6  7  ar
 16  6 25  1
 17  7  8  ar
 18  7 14  ar
 19  8  9  ar
 20  8 26  1
 21  9 10  ar
 22  9 27  1
 23 10 11  1
 24 10 13  ar
 25 11 12  1
 26 12 28  1
 27 12 29  1
 28 12 30  1
 29 13 14  ar
 30 13 31  1
 31 14 15  ar
 32 15 16  ar
 33 15 32  1
 34 16 33  1
@<TRIPOS>SUBSTRUCTURE
  1 LIG      1 TEMP      0 ****      ****      0 ROOT

```
